# Supplementary material for: The Feasibility of Equine Field-Based Postural Sway Analysis Using a Single Inertial Sensor
Source: MDPI journal article supplement (doi:10.3390/s21041286), 2021-02-11

# HORSE 1

Horse 1 Timepoint 0

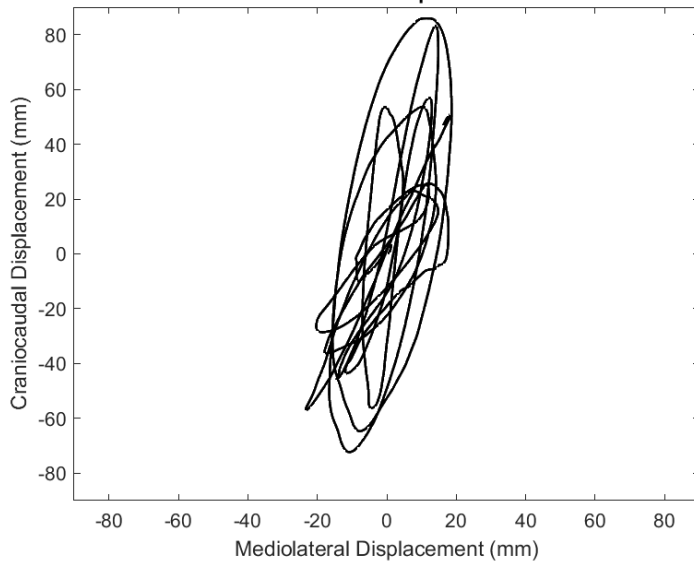

Horse 1 Timepoint 2

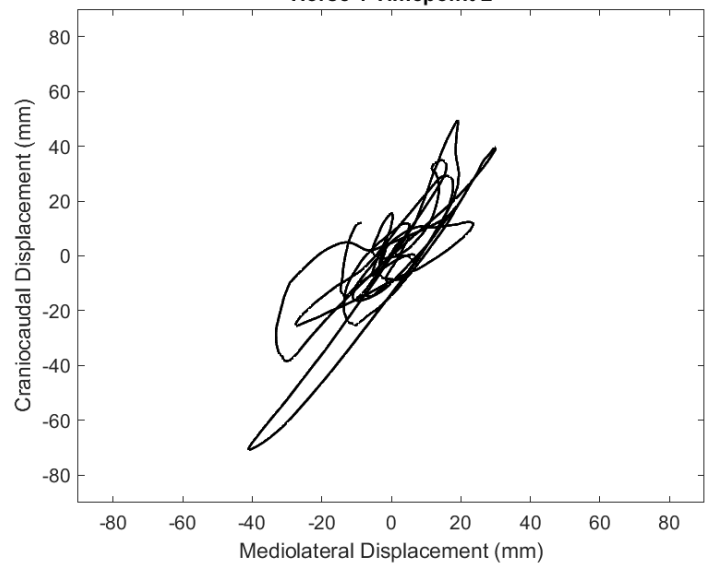

Horse 1 Timepoint 4

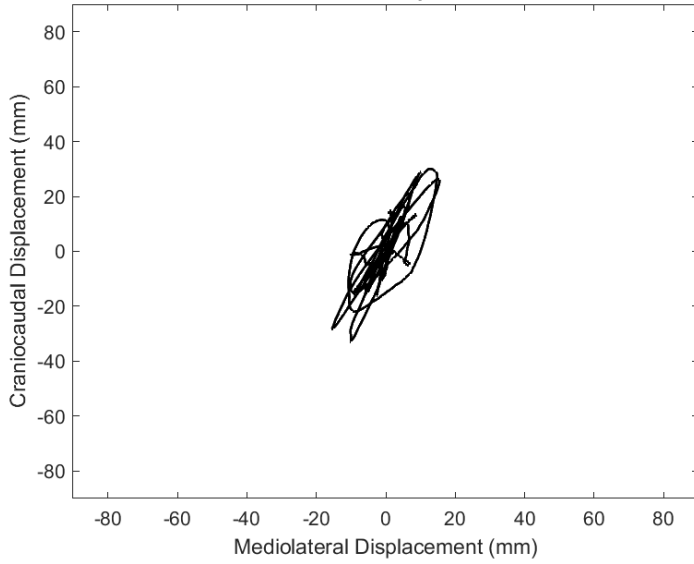

Horse 1 Timepoint 6

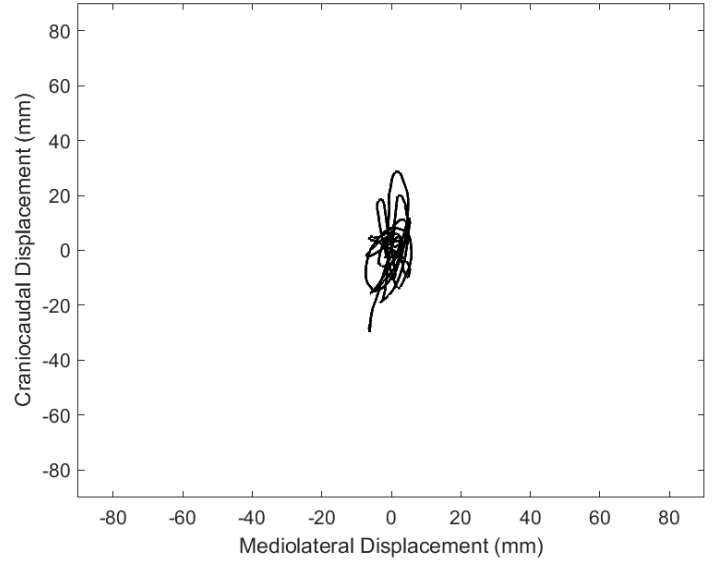

Horse 1 Timepoint 10

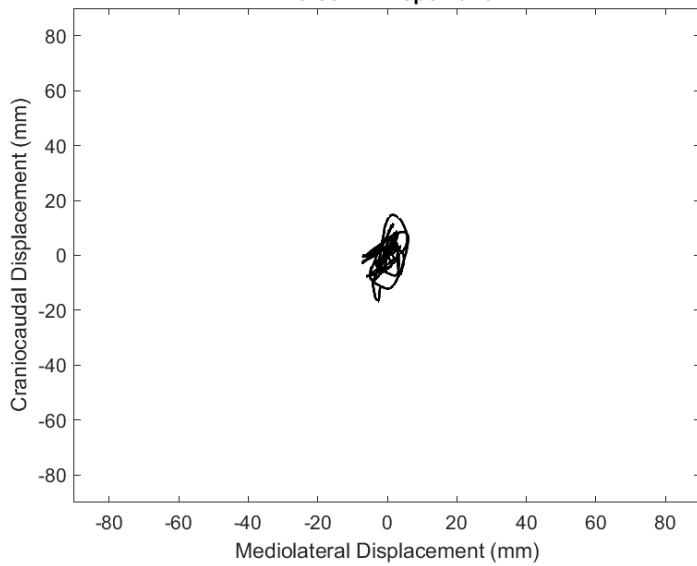

Horse 1 Timepoint 24

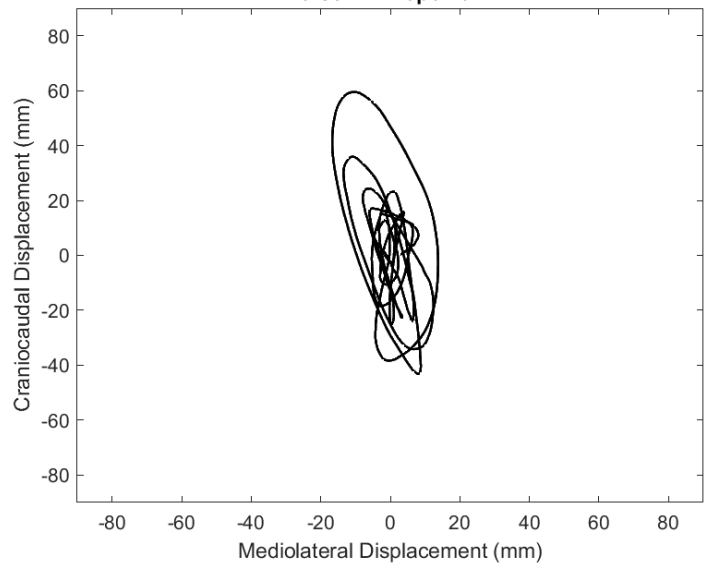

## HORSE 2

Horse 2 Timepoint 0

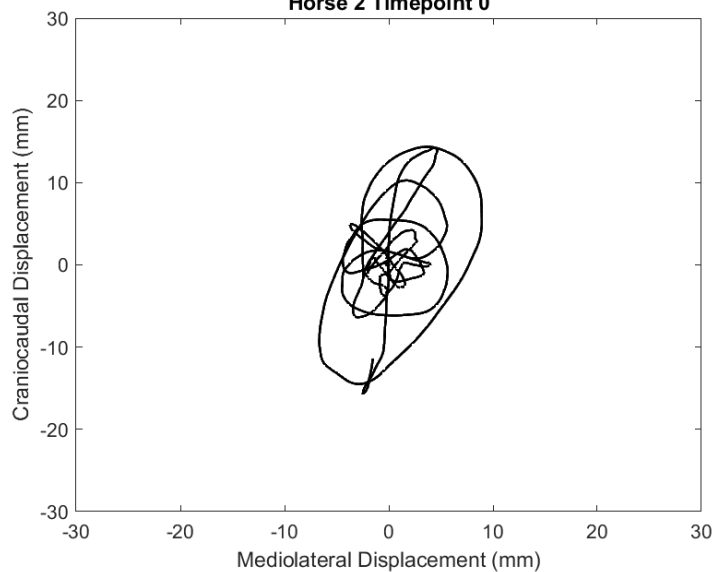

Horse 2 Timepoint 2

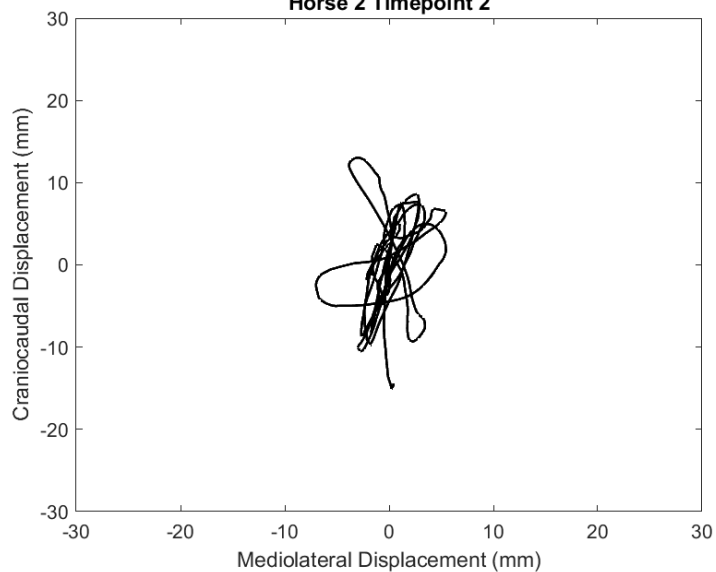

Horse 2 Timepoint 4

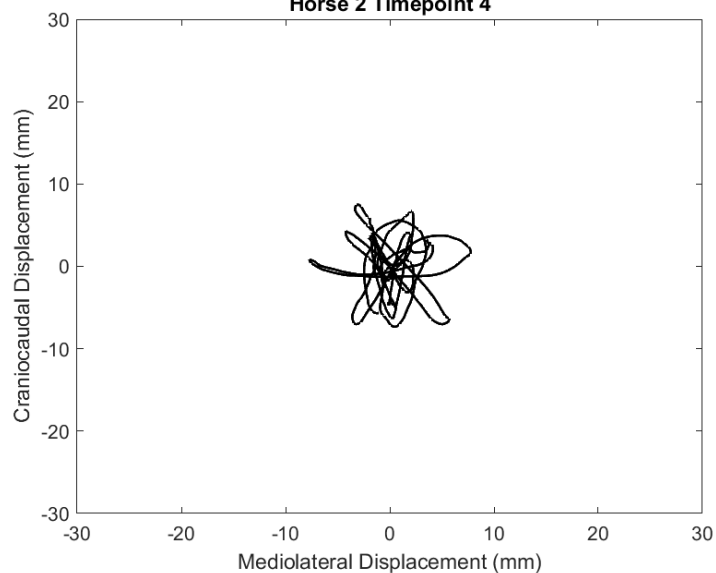

Horse 2 Timepoint 6

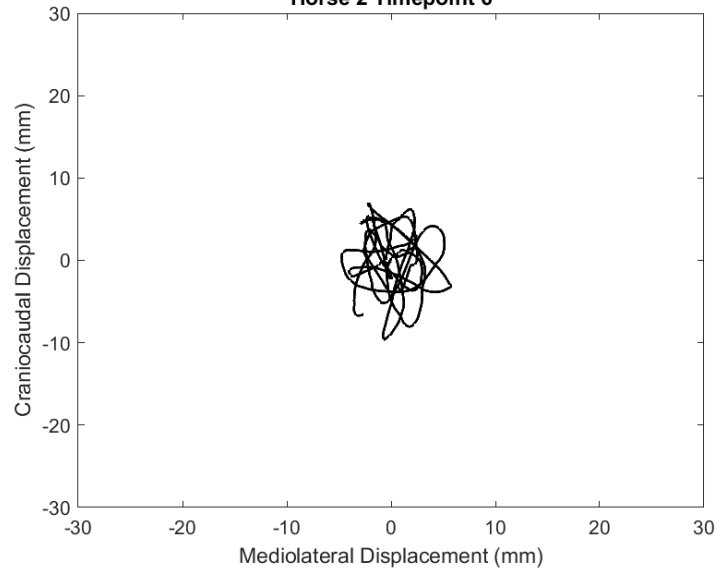

Horse 2 Timepoint 8

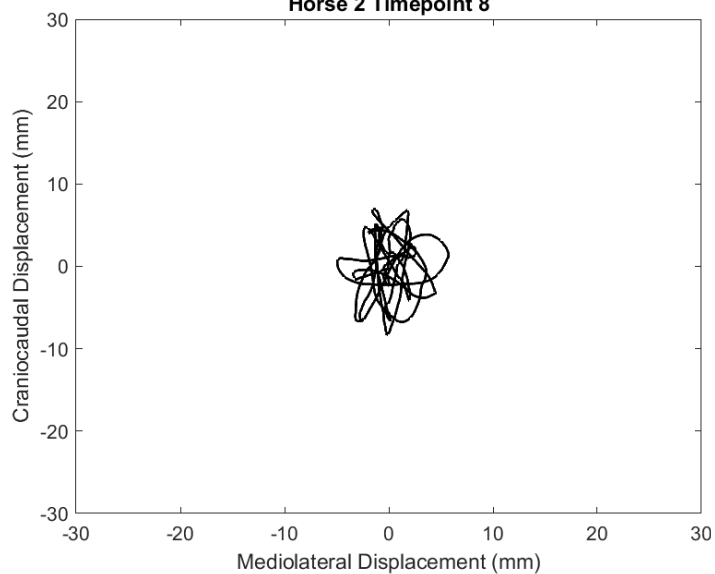

Horse 2 Timepoint 10

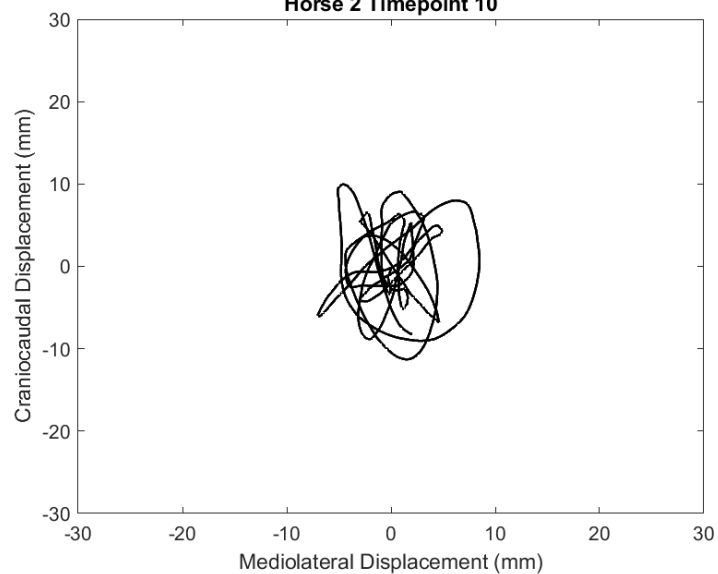

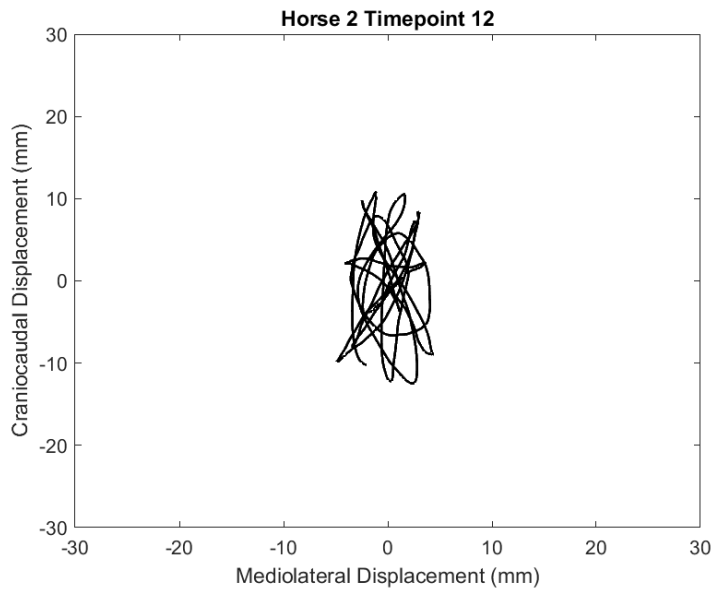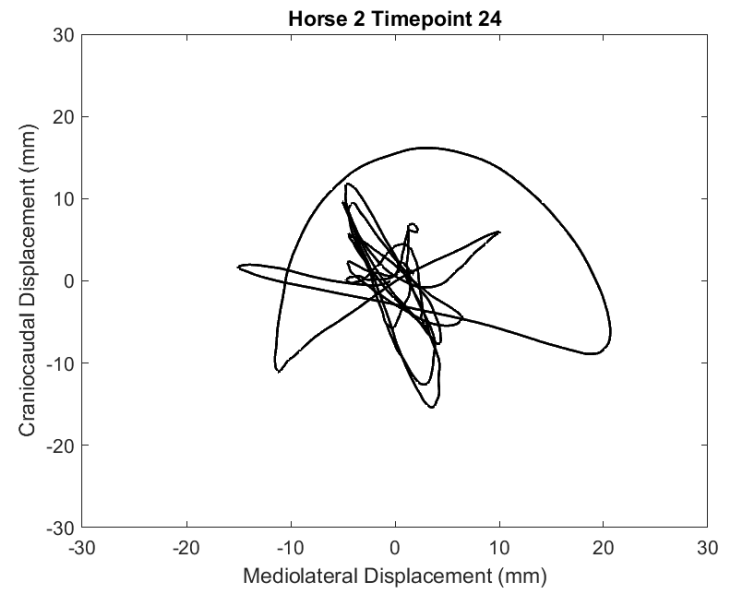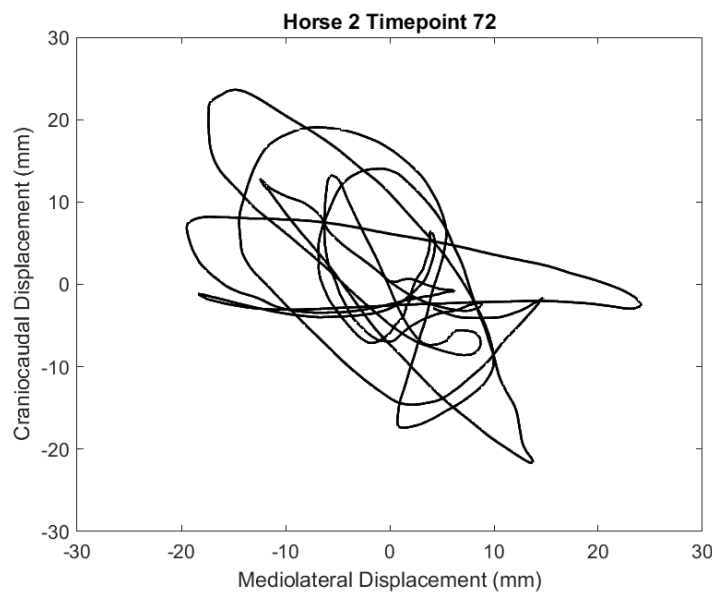

# HORSE 3

Horse 3 Timepoint 2

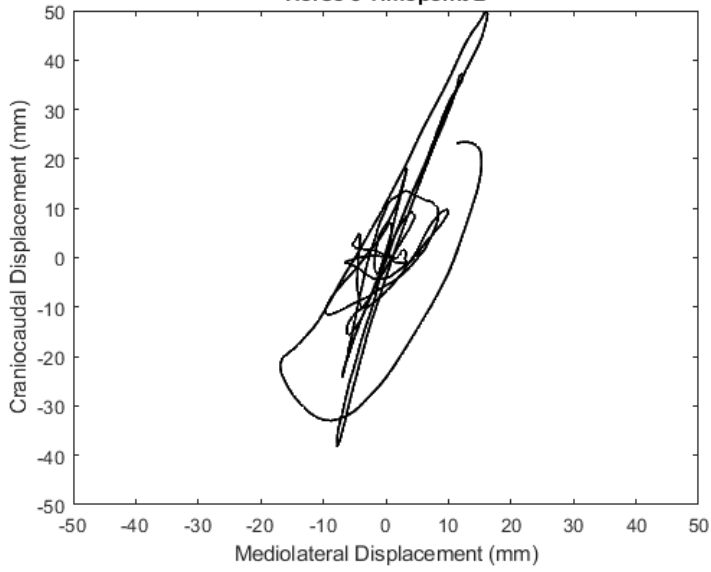

Horse 3 Timepoint 4

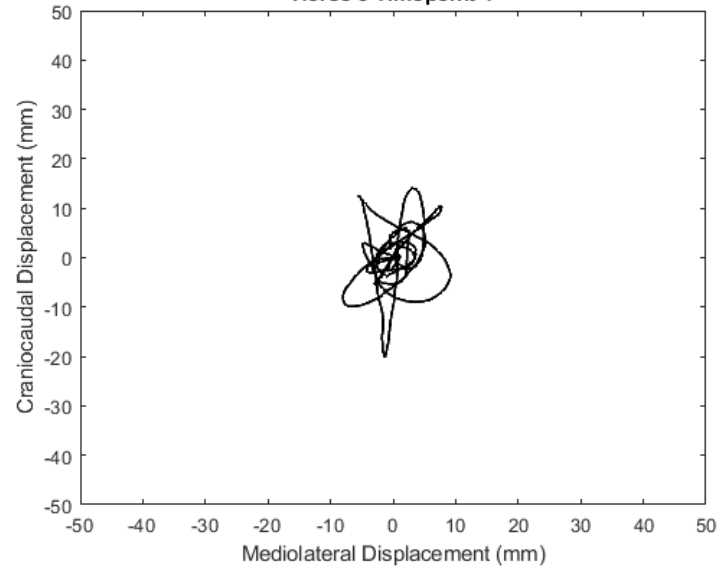

Horse 3 Timepoint 6

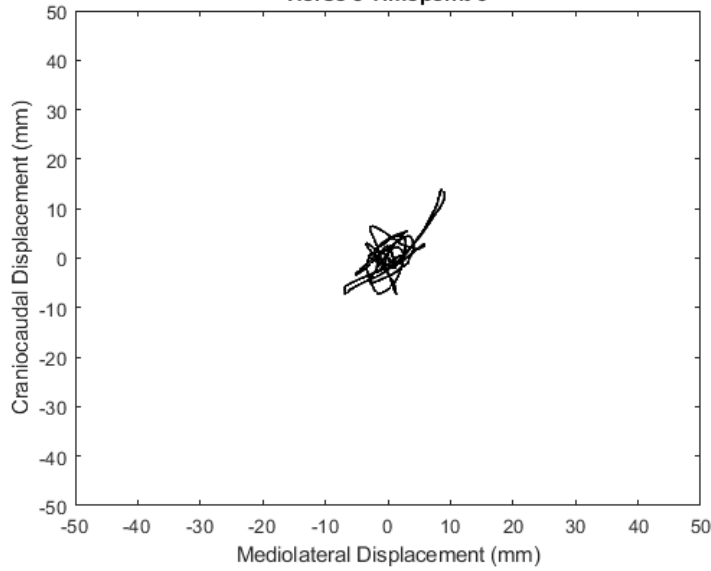

Horse 3 Timepoint 8

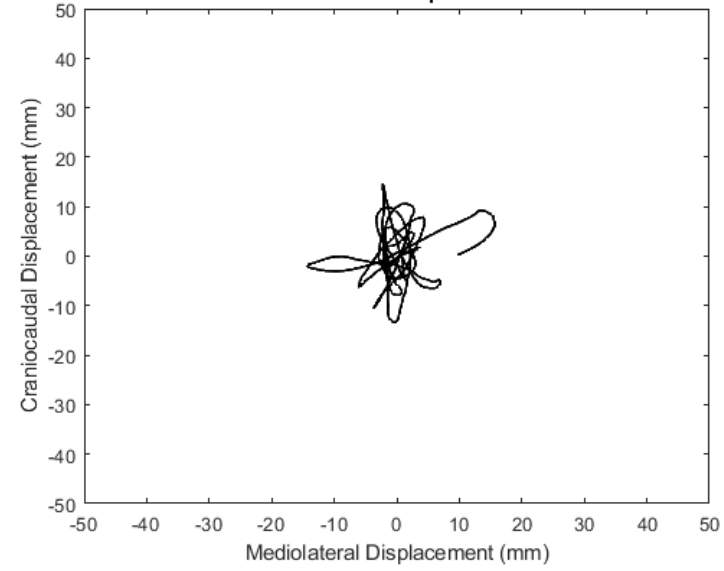

Horse 3 Timepoint 10

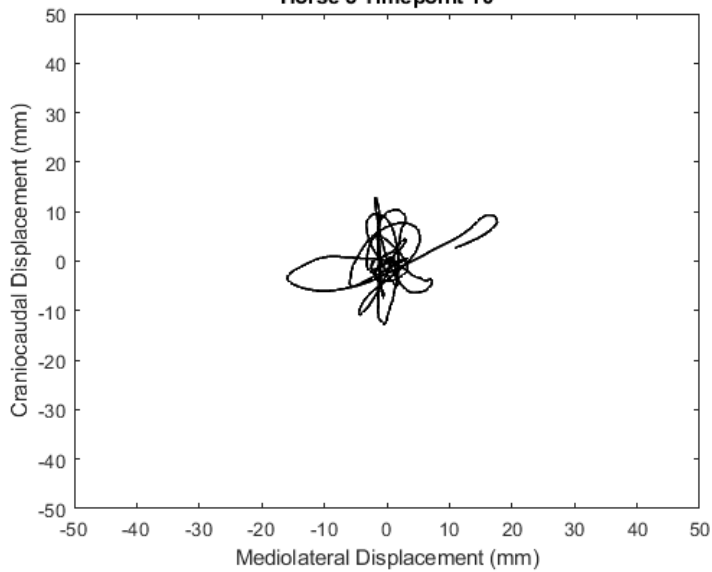

Horse 3 Timepoint 24

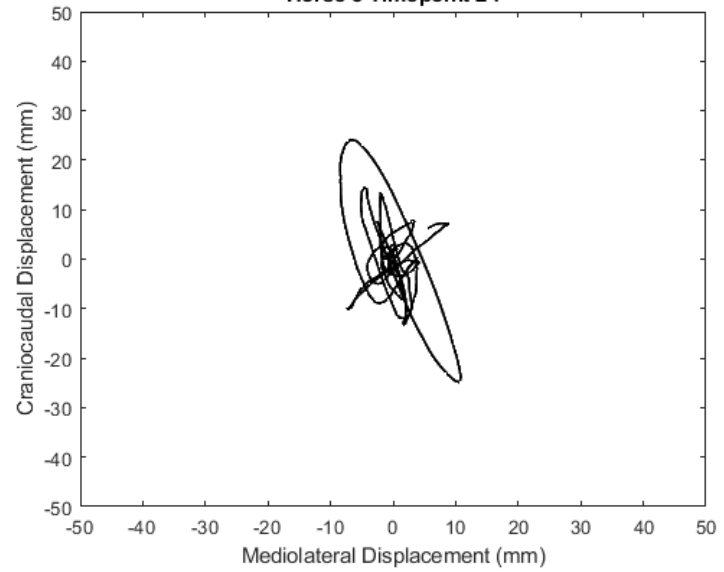

## HORSE 5

Horse 5 Timepoint 0

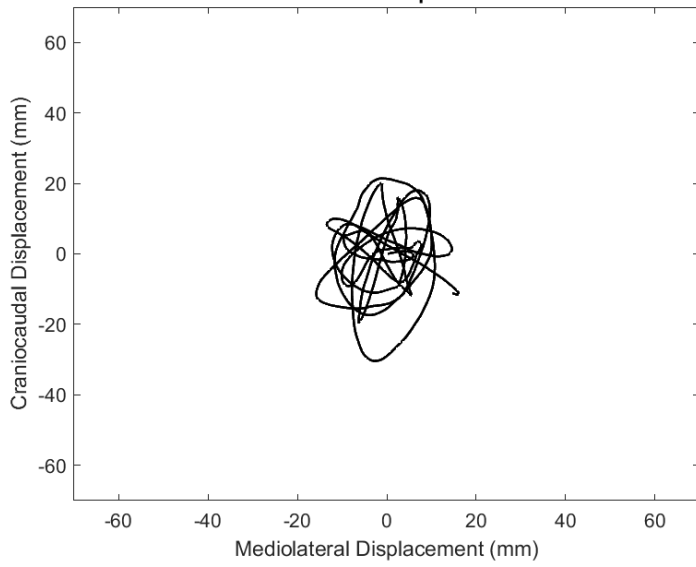

Horse 5 Timepoint 4

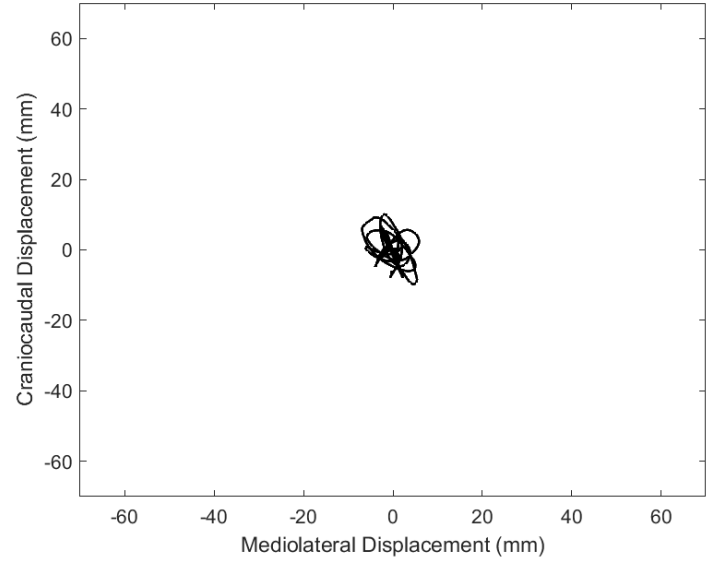

Horse 5 Timepoint 6

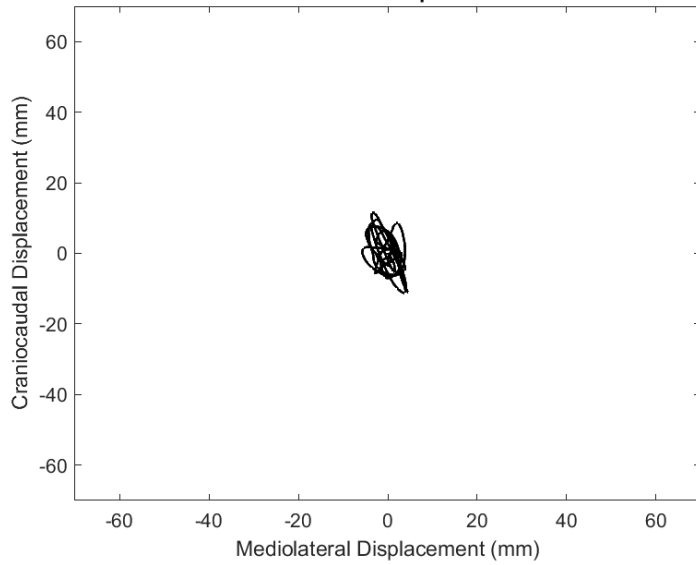

Horse 5 Timepoint 8

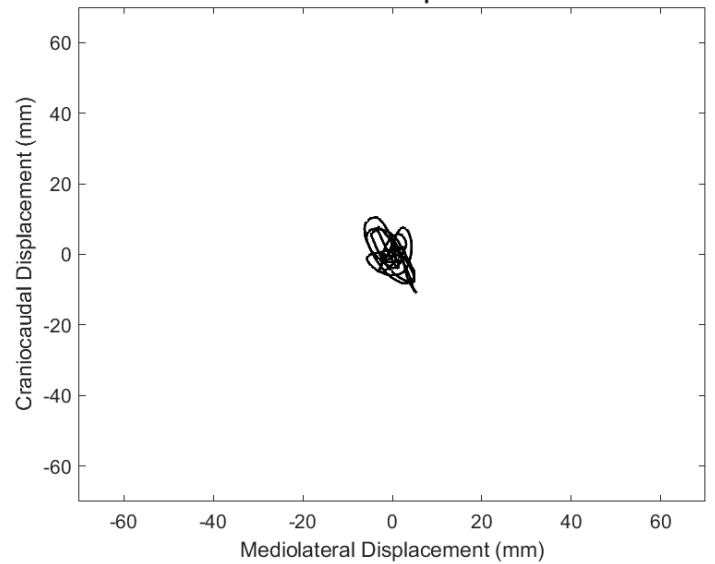

Horse 5 Timepoint 24

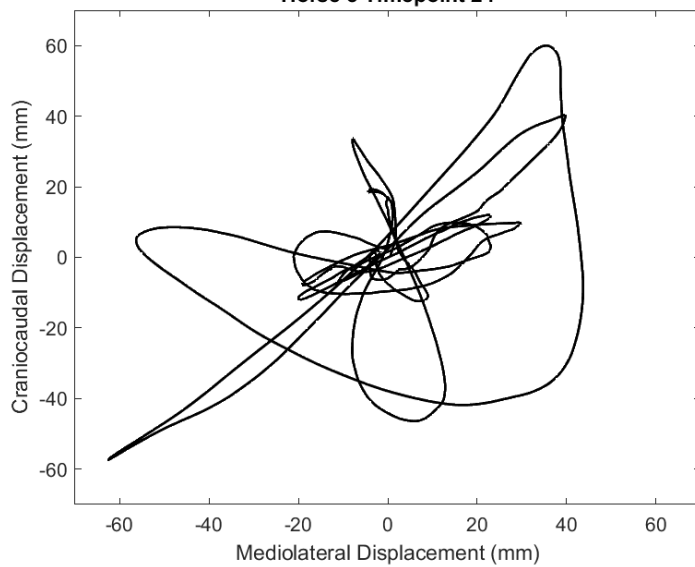

Horse 5 Timepoint 72

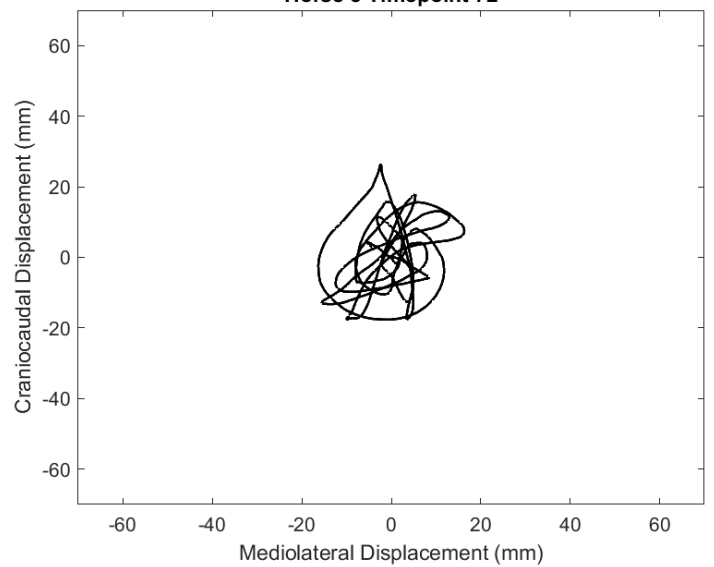

# HORSE 6

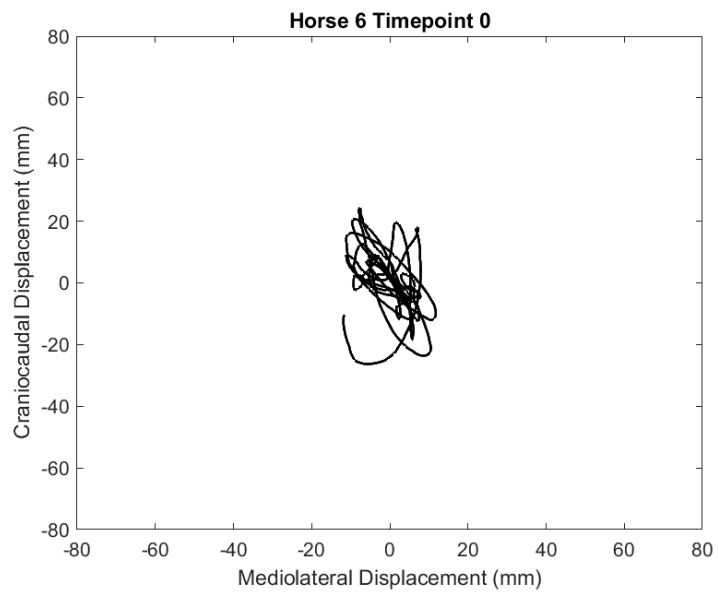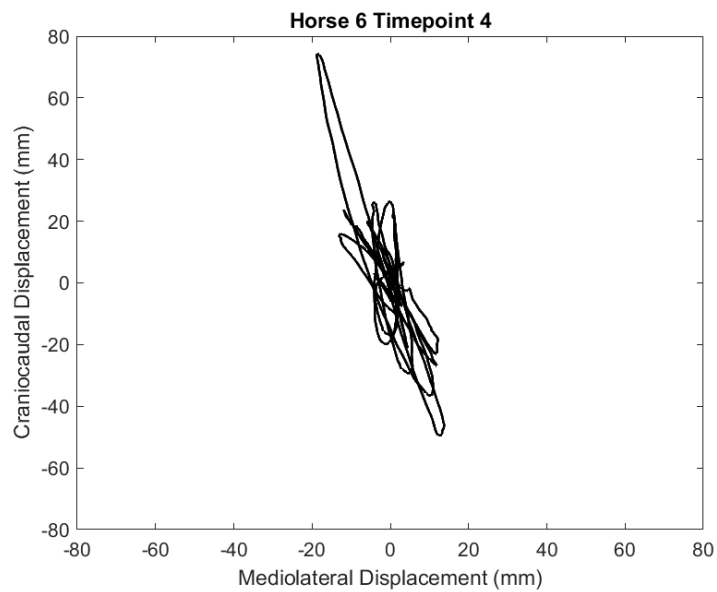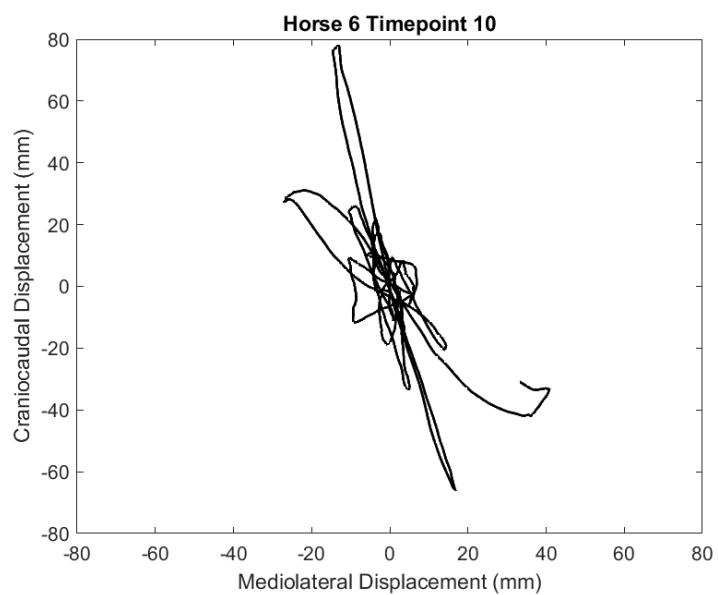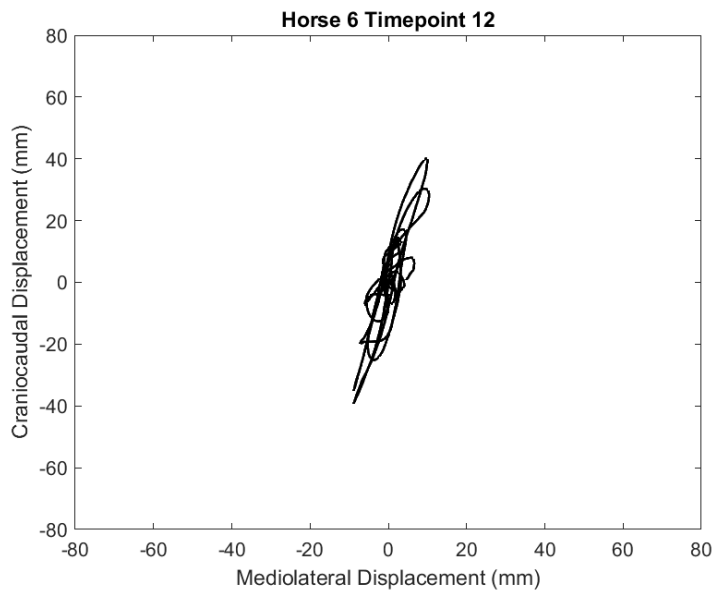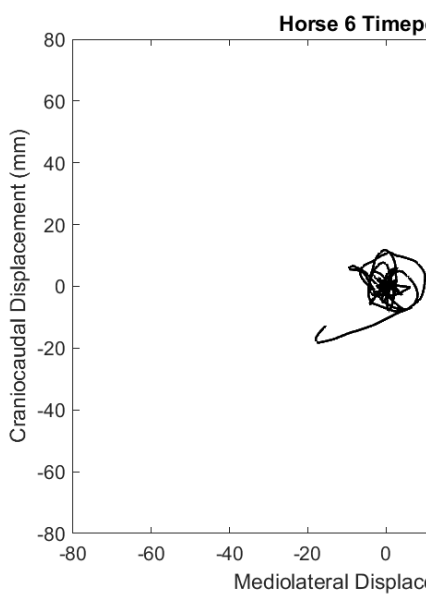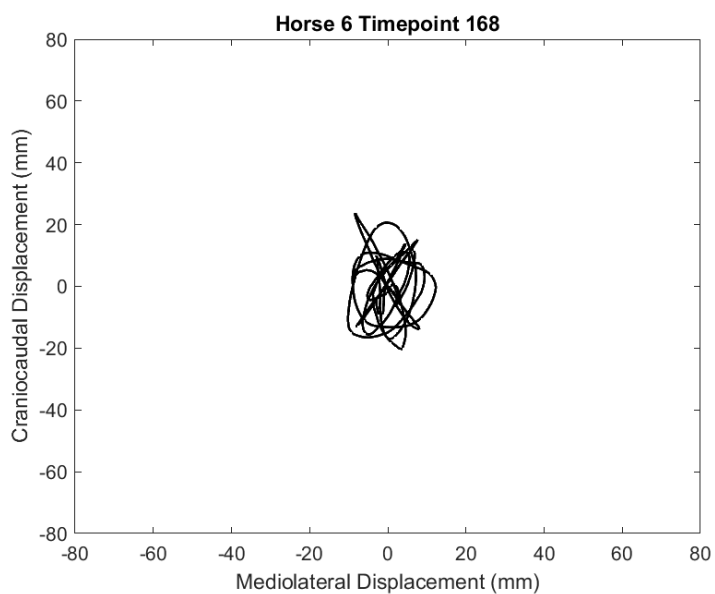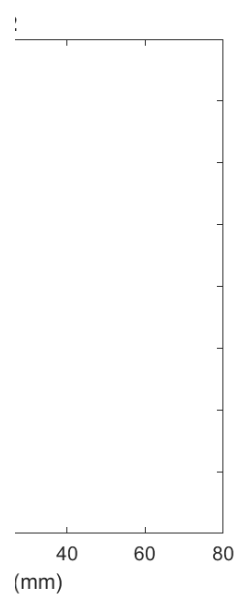

## HORSE 7

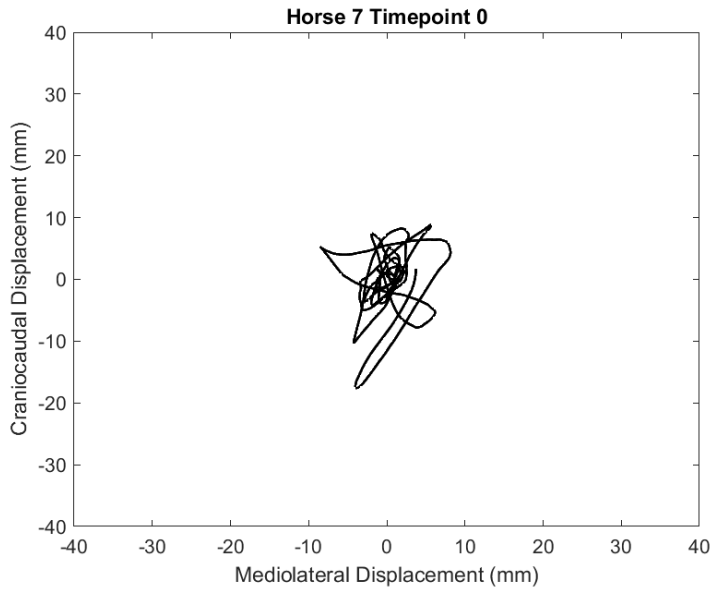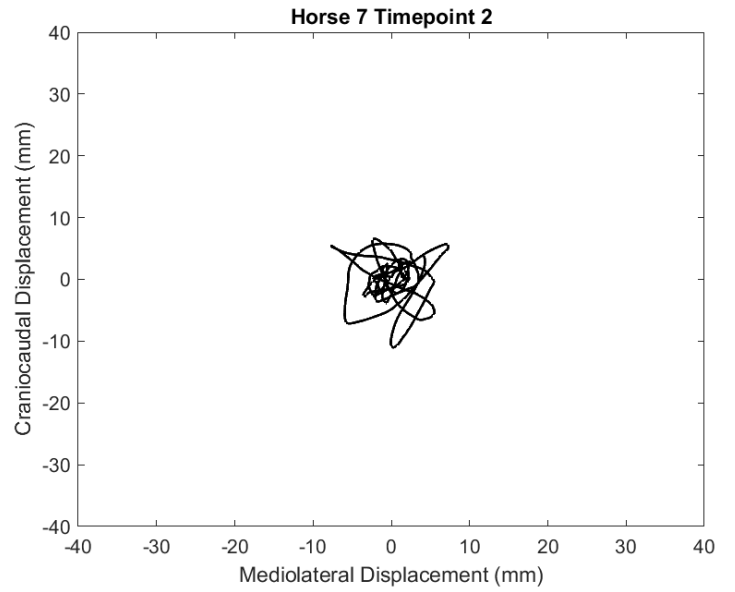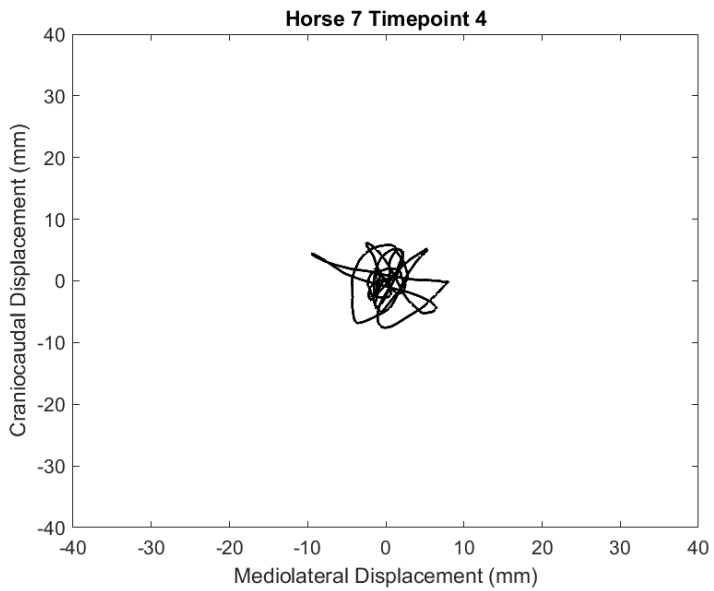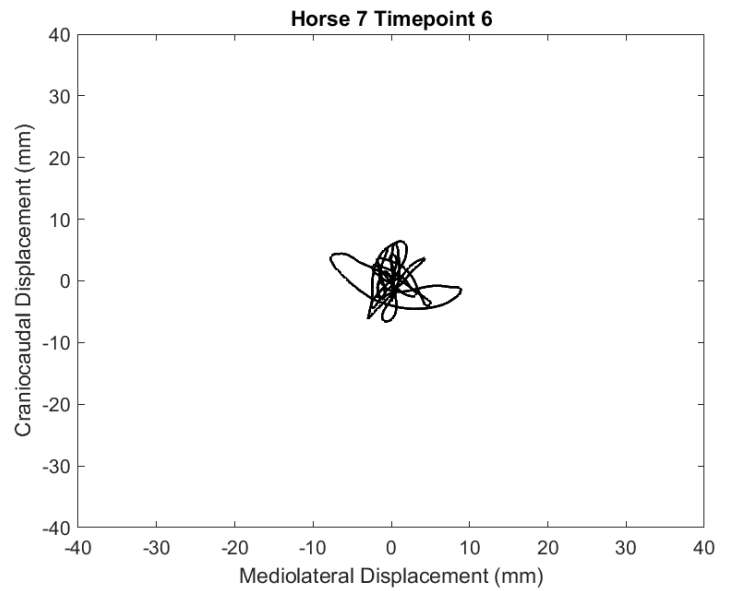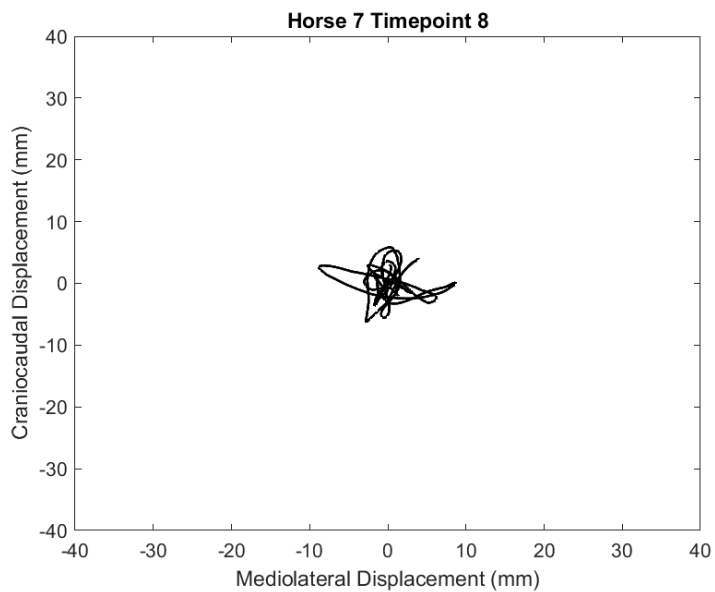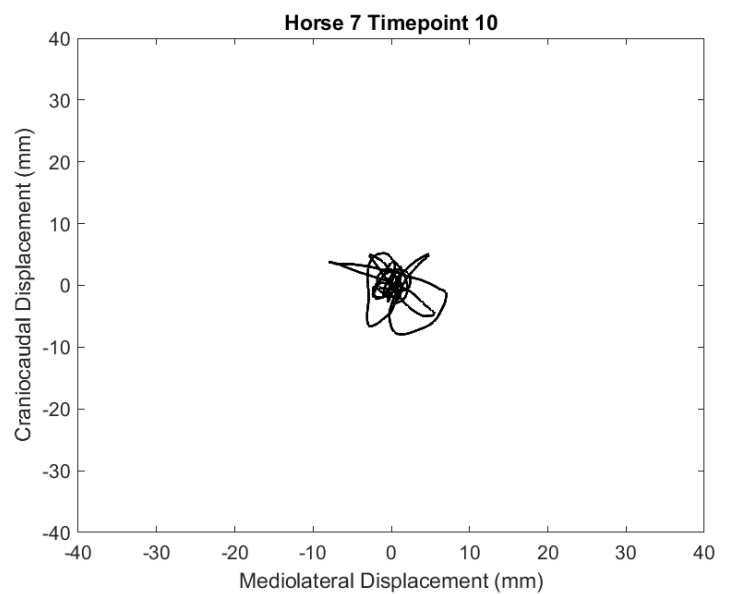

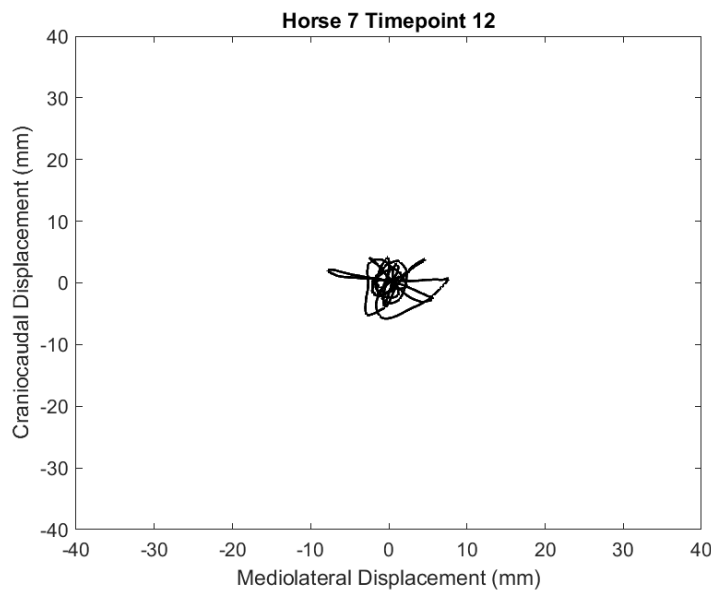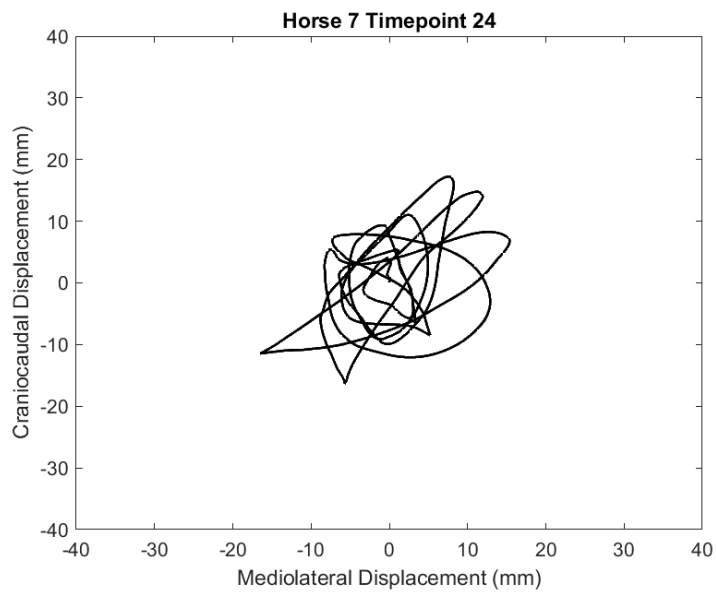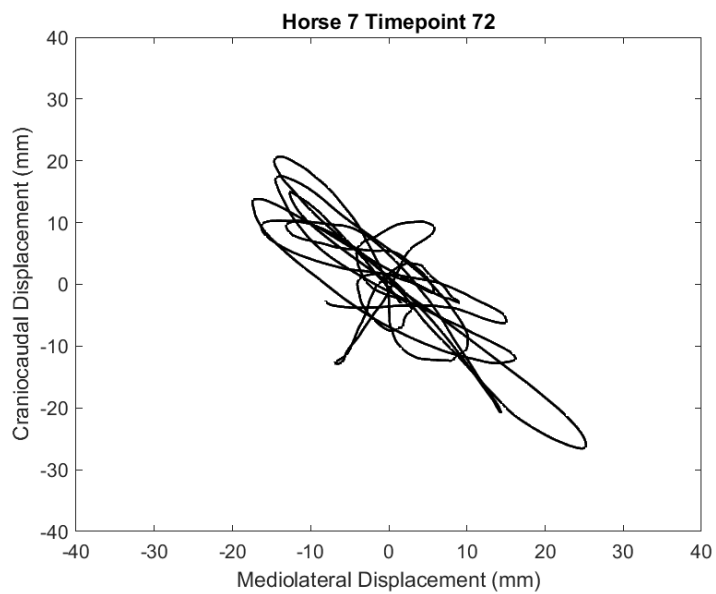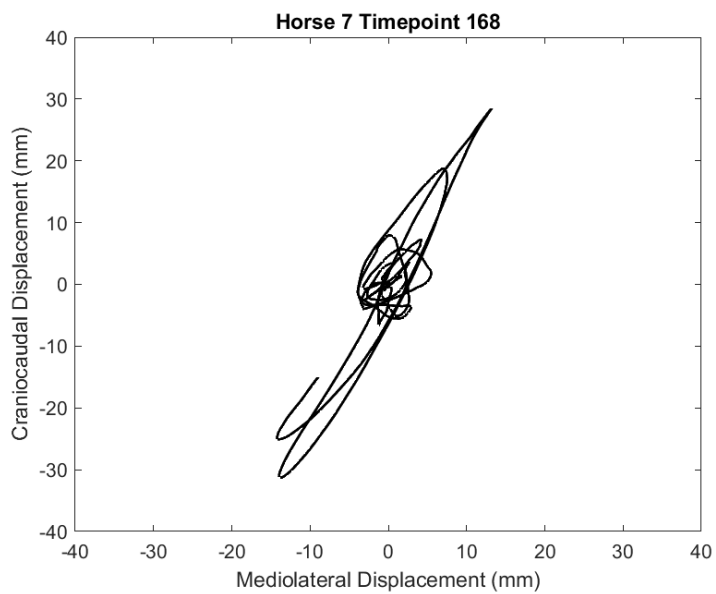

Supplement: s1 [file s1]
